# Supplementary material for: Health-related quality of life of patients with resistant/intolerant chronic phase chronic myeloid leukemia treated with asciminib or bosutinib in the phase 3 ASCEMBL trial
Source: PubMed Central journal article supplement (PMC10169655; doi:10.1038/s41375-023-01888-y), 2023-04-14
Supplement: 41375_2023_1888_MOESM1_ESM.pdf [file 41375_2023_1888_MOESM1_ESM.pdf]

**Supplementary Table S1. Mean (standard deviation) questionnaire scores at baseline**

| Questionnaire score                      | Overall (treatments combined) (N=233) | Asciminib (N=157)  | Bosutinib (N=76)   |
|------------------------------------------|---------------------------------------|--------------------|--------------------|
| <b>MDASI-CML Symptom Severity Score*</b> | <b>2.0 (1.7)</b>                      | <b>2.0 (1.8)</b>   | <b>1.9 (1.7)</b>   |
| Pain                                     | 2.0 (2.7)                             | 2.0 (2.6)          | 2.1 (2.9)          |
| Fatigue                                  | 3.9 (3.1)                             | 4.0 (3.1)          | 3.8 (3.1)          |
| Nausea                                   | 1.3 (2.4)                             | 1.3 (2.4)          | 1.2 (2.3)          |
| Disturbed sleep                          | 2.5 (2.9)                             | 2.7 (3.0)          | 1.9 (2.6)          |
| Feeling of being upset                   | 2.9 (3.2)                             | 2.8 (3.1)          | 3.1 (3.3)          |
| Shortness of breath                      | 2.1 (2.7)                             | 2.1 (2.6)          | 2.0 (2.7)          |
| Remembering things                       | 2.2 (2.6)                             | 2.2 (2.6)          | 2.1 (2.6)          |
| Lack of appetite                         | 1.5 (2.6)                             | 1.7 (2.7)          | 1.2 (2.2)          |
| Feeling drowsy                           | 2.7 (2.9)                             | 2.8 (3.0)          | 2.3 (2.7)          |
| Having a dry mouth                       | 2.4 (2.9)                             | 2.7 (3.0)          | 1.9 (2.6)          |
| Feeling sad                              | 2.4 (3.0)                             | 2.3 (3.0)          | 2.6 (3.1)          |
| Vomiting                                 | 0.5 (1.6)                             | 0.5 (1.5)          | 0.6 (1.9)          |
| Numbness                                 | 1.6 (2.6)                             | 1.5 (2.4)          | 1.8 (2.9)          |
| Diarrhea                                 | 1.0 (2.1)                             | 1.0 (2.1)          | 0.8 (2.0)          |
| Swollen limbs                            | 1.7 (2.6)                             | 1.8 (2.6)          | 1.4 (2.5)          |
| Rash                                     | 1.5 (2.4)                             | 1.6 (2.5)          | 1.1 (2.0)          |
| Muscle soreness                          | 2.3 (2.9)                             | 2.3 (2.9)          | 2.2 (2.9)          |
| Bruising                                 | 1.4 (2.3)                             | 1.2 (2.2)          | 1.7 (2.5)          |
| Malaise                                  | 2.1 (2.8)                             | 2.0 (2.7)          | 2.4 (3.2)          |
| Headache                                 | 1.9 (2.9)                             | 1.9 (2.9)          | 1.9 (3.0)          |
| <b>MDASI-CML Symptom Distress Score*</b> | <b>2.3 (2.6)</b>                      | <b>2.2 (2.6)</b>   | <b>2.5 (2.7)</b>   |
| General activity                         | 2.6 (3.0)                             | 2.6 (3.0)          | 2.6 (3.1)          |
| Mood                                     | 2.7 (3.0)                             | 2.6 (3.0)          | 3.0 (3.0)          |
| Work                                     | 2.8 (3.2)                             | 2.8 (3.2)          | 2.7 (3.3)          |
| Relations with other people              | 1.8 (2.7)                             | 1.6 (2.7)          | 2.0 (2.9)          |
| Walking                                  | 2.0 (2.8)                             | 1.8 (2.7)          | 2.3 (3.1)          |
| Enjoyment of life                        | 2.2 (3.1)                             | 2.1 (3.0)          | 2.5 (3.2)          |
| <b>EQ-5D-5L VAS†</b>                     | <b>72.2 (20.8)</b>                    | <b>71.3 (21.7)</b> | <b>74.2 (18.8)</b> |
| <b>WPAI-CML‡</b>                         |                                       |                    |                    |
| Work time missed due to CML              | 16.1% (31.4)                          | 20.3% (34.9)       | 3.1% (8.1)         |
| Impairment while working due to CML      | 20.3% (29.9)                          | 22.6% (31.1)       | 13.8% (26.2)       |
| Overall work impairment due to CML       | 23.4% (32.8)                          | 26.3% (34.4)       | 15.6% (27.2)       |
| Activity impairment due to problem       | 27.1% (29.5)                          | 28.3% (30.3)       | 24.5% (27.6)       |

CML=chronic myeloid leukemia; EQ-5D-5L=five-level EQ-5D; MDASI-CML=M. D. Anderson Symptom Inventory – CML; VAS=visual analogue scale

\*Score ranges from 0 to 10, with a higher score indicating greater symptom severity/interference.

†Score ranges from 0 to 100, with a higher score indicating a better health state.

‡Score ranges from 0% to 100%, with a higher score indicating greater impairment.

**Supplementary Table S2. Overall change from Baseline in PRO scores up to Week 48: CML symptoms and interference (MDASI-CML), general HRQOL (EQ-5D-5L VAS), and work impairment (WPAI-CML)**

| PRO Score                      | Average Change from baseline<br>(LS Mean [95% CI])                                      |                        | Difference between<br>treatments in average change<br>from baseline (LS Mean<br>Difference [95% CI]) |
|--------------------------------|-----------------------------------------------------------------------------------------|------------------------|------------------------------------------------------------------------------------------------------|
|                                | Asciminib (N=157)                                                                       | Bosutinib (N=76)       |                                                                                                      |
| <b>MDASI-CML</b>               | <b>Negative change indicates improvement<br/>(i.e., fewer symptoms or interference)</b> |                        | <b>Negative difference favors<br/>asciminib</b>                                                      |
| Symptom Severity Score         | -0.5 (-0.7, -0.3)                                                                       | 0.0 (-0.3, 0.3)        | -0.5 (-0.9, -0.2)                                                                                    |
| Pain                           | -0.4 (-0.7, -0.1)                                                                       | 0.2 (-0.3, 0.7)        | -0.6 (-1.1, -0.0)                                                                                    |
| Fatigue                        | -1.1 (-1.5, -0.8)                                                                       | -0.8 (-1.3, -0.3)      | -0.3 (-0.9, 0.3)                                                                                     |
| Nausea                         | -0.5 (-0.8, -0.3)                                                                       | 0.7 (0.3, 1.1)         | -1.2 (-1.7, -0.8)                                                                                    |
| Disturbed sleep                | -0.3 (-0.7, 0.0)                                                                        | 0.2 (-0.3, 0.8)        | -0.6 (-1.2, 0.1)                                                                                     |
| Feeling of being upset         | -0.9 (-1.2, -0.6)                                                                       | -0.4 (-0.9, 0.0)       | -0.5 (-1.0, 0.1)                                                                                     |
| Shortness of breath            | -0.5 (-0.8, -0.2)                                                                       | -0.1 (-0.6, 0.3)       | -0.4 (-0.9, 0.1)                                                                                     |
| Remembering things             | -0.2 (-0.5, 0.1)                                                                        | -0.2 (-0.6, 0.3)       | -0.0 (-0.6, 0.5)                                                                                     |
| Lack of appetite               | -0.4 (-0.7, -0.2)                                                                       | 0.4 (-0.0, 0.7)        | -0.8 (-1.2, -0.4)                                                                                    |
| Feeling drowsy                 | -0.4 (-0.8, -0.1)                                                                       | 0.2 (-0.3, 0.7)        | -0.6 (-1.2, -0.1)                                                                                    |
| Having a dry mouth             | -0.9 (-1.2, -0.6)                                                                       | -0.3 (-0.7, 0.1)       | -0.6 (-1.1, -0.1)                                                                                    |
| Feeling sad                    | -0.8 (-1.1, -0.5)                                                                       | -0.3 (-0.7, 0.2)       | -0.5 (-1.0, 0.0)                                                                                     |
| Vomiting                       | -0.2 (-0.4, -0.0)                                                                       | 0.4 (0.2, 0.7)         | -0.6 (-1.0, -0.3)                                                                                    |
| Numbness                       | -0.2 (-0.5, 0.1)                                                                        | 0.1 (-0.4, 0.5)        | -0.2 (-0.7, 0.3)                                                                                     |
| Diarrhea                       | -0.2 (-0.5, 0.0)                                                                        | <b>1.5 (1.1, 1.9)*</b> | <b>-1.7 (-2.2, -1.3)*</b>                                                                            |
| Swollen limbs                  | -0.4 (-0.7, -0.2)                                                                       | -0.3 (-0.7, 0.0)       | -0.1 (-0.5, 0.3)                                                                                     |
| Rash                           | -0.0 (-0.3, 0.3)                                                                        | 0.2 (-0.2, 0.6)        | -0.2 (-0.7, 0.3)                                                                                     |
| Muscle soreness                | -0.6 (-0.9, -0.3)                                                                       | -0.5 (-0.9, -0.1)      | -0.1 (-0.6, 0.4)                                                                                     |
| Bruising                       | -0.4 (-0.6, -0.3)                                                                       | -0.5 (-0.8, -0.2)      | 0.1 (-0.2, 0.4)                                                                                      |
| Malaise                        | -0.4 (-0.7, -0.1)                                                                       | 0.1 (-0.4, 0.5)        | -0.5 (-1.0, 0.0)                                                                                     |
| Headache                       | -0.5 (-0.8, -0.2)                                                                       | -0.0 (-0.5, 0.4)       | -0.5 (-1.0, 0.0)                                                                                     |
| Symptom Distress Score         | -0.5 (-0.7, -0.2)                                                                       | -0.2 (-0.6, 0.2)       | -0.3 (-0.7, 0.2)                                                                                     |
| General activity               | -0.6 (-0.9, -0.3)                                                                       | -0.4 (-0.9, 0.1)       | -0.3 (-0.8, 0.3)                                                                                     |
| Mood                           | -0.7 (-1.0, -0.4)                                                                       | -0.3 (-0.8, 0.1)       | -0.3 (-0.9, 0.2)                                                                                     |
| Work                           | -0.6 (-0.9, -0.2)                                                                       | -0.0 (-0.6, 0.5)       | -0.5 (-1.2, 0.1)                                                                                     |
| Relations with other<br>people | -0.4 (-0.6, -0.1)                                                                       | -0.2 (-0.6, 0.3)       | -0.2 (-0.7, 0.3)                                                                                     |
| Walking                        | -0.2 (-0.5, 0.0)                                                                        | -0.3 (-0.7, 0.1)       | 0.1 (-0.4, 0.6)                                                                                      |
| Enjoyment of life              | -0.3 (-0.6, -0.0)                                                                       | -0.0 (-0.5, 0.4)       | -0.3 (-0.8, 0.2)                                                                                     |
| <b>EQ-5D-5L</b>                | <b>Positive change indicates improvement<br/>(i.e., better HRQOL)</b>                   |                        | <b>Positive difference favors<br/>asciminib</b>                                                      |
| VAS                            | 4.8 (2.4, 7.2)                                                                          | 0.9 (-2.8, 4.6)        | 3.9 (-0.5, 8.2)                                                                                      |

| PRO Score                                | Average Change from baseline<br>(LS Mean [95% CI])                       |                    | Difference between<br>treatments in average change<br>from baseline (LS Mean<br>Difference [95% CI]) |
|------------------------------------------|--------------------------------------------------------------------------|--------------------|------------------------------------------------------------------------------------------------------|
|                                          | Asciminib (N=157)                                                        | Bosutinib (N=76)   |                                                                                                      |
| <b>WPAI-CML</b>                          | <b>Negative change indicates improvement<br/>(i.e., less impairment)</b> |                    | <b>Negative difference favors<br/>asciminib</b>                                                      |
| Activity impairment                      | -6.5% (-9.6, -3.5)                                                       | -1.0% (-5.9, 3.8)  | -5.5% (-11.1, 0.1)                                                                                   |
| Work time missed <sup>†</sup>            | -0.1% (-5.0, 4.8)                                                        | -5.0% (-14.2, 4.1) | 4.9% (-5.4, 15.3)                                                                                    |
| Impairment while<br>working <sup>†</sup> | -6.8% (-10.9, -2.6)                                                      | -3.4% (-10.8, 4.0) | -3.4% (-11.8, 5.0)                                                                                   |
| Overall work<br>impairment <sup>†</sup>  | -4.4% (-9.8, 0.9)                                                        | -2.3% (-11.8, 7.2) | -2.1% (-12.9, 8.7)                                                                                   |

\*Clinically meaningful changes/differences (based on following thresholds: MDASI-CML=1.5; EQ-5D-5L VAS=7; WPAI-CML=15%)

<sup>†</sup>Items only completed by patients who were working (asciminib n=69 at baseline; bosutinib n=25 at baseline)

**Supplementary Figure S1. PGIC-CML Item Response by Timepoint for Asciminib (N=157) and Bosutinib (N=76)**

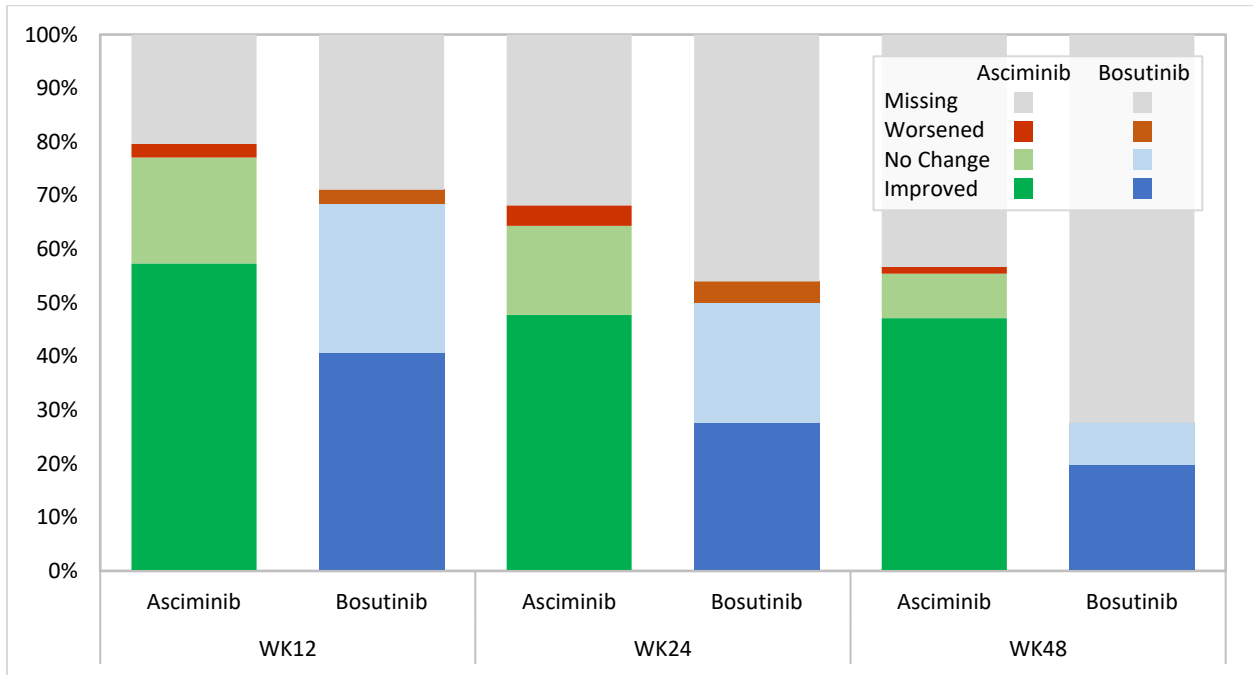

Response groupings based on a seven-point scale from 1 (very much improved) to 7 (very much worse). Improved: responses 1, 2, or 3; Stable: response 4; Worsened: responses 5, 6, or 7
